# Supplementary material
Source: HighWire-hosted journal article supplement (doi:10.1101/rna.081007.126)
Supplement: Supplemental_TableS1_nup211_RNAseq.xlsx [file Supplemental_TableS1_nup211_RNAseq.xlsx]

## Sheet: nup211_coding_UP
SystematicID	Gene.name	Product	log2FoldChange
SPCC18B5.02c		cinnamoyl-CoA reductase pseudogene	4.78216
SPCC663.08c		short chain dehydrogenase, unknown specificity	4.39406
SPCC663.06c	osr1	short chain dehydrogenase, unknown specificity	4.26923
SPCC965.07c	gst2	glutathione S-transferase Gst2	4.05734
SPAC750.01		NADP-dependent aldo/keto reductase, unknown biological role, implicated in cellular detoxification	3.5778
SPBC23G7.10c		NADH-dependent flavin oxidoreductase, implicated in cellular detoxification from family members	2.76409
SPBPB21E7.04c	cmt2	O-methyltransferase, human COMT catechol homolog 2	2.65161
SPBC609.04	caf5	plasma membrane spermine family transmembrane transporter Caf5	2.64312
SPBC4F6.09	str1	plasma membrane siderophore-iron transmembrane transporter Str1	2.60914
SPBC106.02c	srx1	sulfiredoxin	2.57318
SPAC27D7.09c		But2 family protein, similar to cell surface molecules	2.55328
SPCC737.04		UPF0300 family protein 6	2.54776
SPBC215.11c		aldo/keto reductase, unknown biological role	2.53242
SPBP4G3.03	fub2	PI31 proteasome regulator Fub2	2.52382
SPAPB24D3.08c		NADP-dependent oxidoreductase, implicated in cellular detoxification	2.2725
SPCC18B5.01c	bfr1	plasma membrane brefeldin A efflux transporter Bfr1	2.25981
SPAC1F7.08	fio1	plasma membrane iron transport multicopper oxidase Fio1	2.12548
SPCC1259.14c	meu27	UPF0300 family protein 5	2.10869
SPBC609.01		cytoplasmic P body 3'-5'-exoribonuclease, Dis3L2-related	2.10698
SPAPB1A11.05	sap49	U2 snRNP-associated RNA-binding protein Sap49	2.09245
SPAC9E9.11	plr1	pyridoxal reductase Plr1	2.07621
SPAC9E9.09c	atd1	aldehyde dehydrogenase	2.04516
SPBC8E4.12c	ecl3	extender of chronological lifespan protein Ecl3	1.98828
SPAC3C7.14c	obr1	NAD(P)H dehydrogenase (quinone)	1.98606
SPAC1039.02	efn2	extracellular 5'-nucleotidase, human NT5E family	1.98
SPBC16C6.02c	vps1302	intermembrane lipid transfer protein, chorein family Vps1302	1.89333
SPCC1020.09	gnr1	heterotrimeric G protein beta (WD repeat) subunit Gnr1	1.86859
SPAC22F3.02	atf31	DNA-binding transcription factor Atf31	1.78684
SPAC2F7.06c	pol4	DNA polymerase X family	1.77453
SPAC1F7.07c	fip1	plasma membrane iron transmembrane transporter Fip1	1.75424
SPAC6G10.03c		lysophospholipid acyltransferase	1.74672
SPCC737.08	mdn1	midasin, Mdn1	1.65255
SPAC23G3.02c	sib1	ferrichrome synthetase Sib1	1.64026
SPBPJ4664.02		crazy cell surface glycoprotein	1.61255
SPBC1685.13	fhn1	eisosome assembly protein Fhn1	1.60556
SPAC29A4.11	rga3	RhoGAP, GTPase activating protein Rga3	1.59844
SPBC2A9.02		NADH-dependent glycolaldehyde/furfural/butyraldehyde/propylaldehydealdehyde reductase	1.56214
SPBC56F2.06	mug147	Schizosaccharomyces specific protein Mug147	1.55817
SPAC31G5.06	rrg8	mitochondrial conserved fungal protein Rrg8	1.54689
SPBC19C7.04c	gsr1	1,3-beta-glucan synthesis regulator, Gsr1	1.493
SPCC1840.12	opt3	OPT oligopeptide transmembrane transporter family protein Opt3	1.48346
SPAPB24D3.07c		glycosyl hydrolase (predicted by Pfam-N)	1.46232
SPAPB1A11.01	mfc1	prospore membrane copper transmembrane transporter Mfc1	1.46104
SPAC977.13c		hydrolase, pseudogene (4 frameshifts)	1.45366
SPBC21C3.01c	vps1301	intermembrane lipid transfer protein, chorein family Vps13a	1.45071
SPAC19G12.09		mycotoxin detoxification NADH/NADPH-dependent acetaldehyde reductase	1.44833
SPAC6B12.02c	mus7	DNA repair protein Mus7/Mms22	1.44814
SPAC26F1.04c	etr1	enoyl-[acyl-carrier protein] reductase	1.42979
SPBC1198.14c	fbp1	fructose-1,6-bisphosphatase Fbp1	1.42243
SPBC23G7.04c	nif1	SEL1/TPR repeat protein, protein kinase inhibitor Nif1	1.4173
SPAC1093.06c	dhc1	dynein heavy chain, minus-end directed microtubule motor Dhc1	1.41607
SPCC569.05c		plasma membrane spermidine family transmembrane transporter	1.40241
SPAC4H3.08	fox2	3-hydroxyacyl-CoA dehydrogenase	1.40222
SPBC32H8.13c	mok12	prospore membrane alpha-1,3-glucan synthase Mok12	1.39638
SPAC23H3.15c	ddr48	DNA damage-responsive protein Ddr48	1.38372
SPBC24C6.09c		phosphoketolase family protein	1.38361
SPAC1F5.11c	tra2	NuA4 complex phosphatidylinositol pseudokinase complex subunit Tra2	1.37232
SPBC16D10.05	mok13	alpha-1,3-glucan synthase Mok13	1.3676
SPAC19D5.04	ptr1	HECT-type ubiquitin-protein ligase E3 Ptr1	1.35703
SPBC1773.06c	adh8	zinc binding alcohol dehydrogenase family, unknown pathway	1.3423
SPAC8C9.03	cgs1	cAMP-dependent protein kinase regulatory subunit Cgs1	1.33191
SPAC977.14c		aldo/keto reductase, predicted calcium channel regulator	1.3067
SPCC1322.03	trp1322	plasma membrane TRP-like calcium ion channel Trp1322	1.29559
SPCC1223.13	cbf12	DNA-binding transcription factor, CBF1/Su(H)/LAG-1 family Cbf12	1.27348
SPCC663.07c		short chain dehydrogenase pseudogene	1.27093
SPAC5H10.04		NADPH dehydrogenase, (Old yellow enzyme) involved in small alpha,beta-unsaturated carbonyl compounds	1.25154
SPCC2H8.02	pho843	plasma membrane inorganic phosphate transmembrane transporter Pho843	1.23962
SPBC1348.12		DNA-binding transcription factor	1.23785
SPAC3H5.09c	hob2	ER-PM contact site phospholipid-binding protein Hob2	1.23391
SPBC216.05	rad3	ATR checkpoint kinase Rad3	1.22784
SPBP16F5.03c	tra1	SAGA complex/ASTRA complex, phosphatidylinositol pseudokinase Tra1	1.22361
SPAC1B3.15c		transmembrane transporter	1.21353
SPAPJ691.02	moh1	yippee-like protein	1.21195
SPBC365.12c	ish1	nuclear envelope Ish domain protein Ish1	1.19589
SPAC31G5.07	dni1	tetraspan protein, claudin Dni1	1.19211
SPBP4H10.10	rbd3	mitochondrial rhomboid family protease	1.18614
SPBC9B6.03	pib2	zf-FYVE type zinc finger protein and glutamine sensor Pib2	1.18516
SPBC354.12	gpd3	glyceraldehyde 3-phosphate dehydrogenase Gpd3	1.17819
SPAC23C11.06c		vacuolar membrane hydrolase, implicted in protein catabolism	1.17225
SPBC25H2.13c	cdc20	DNA polymerase epsilon catalytic subunit Pol2	1.15093
SPBC16D10.08c	hsp104	heat shock protein, disaggregase Hsp104	1.1451
SPCC338.18		Schizosaccharomyces pombe specific protein	1.13861
SPAC1A6.08c	mug125	Schizosaccharomyces specific protein Mug125	1.13793
SPCC794.03		plasma membrane amino acid derivative transmembrane transporter	1.11496
SPCC63.14	eis1	eisosome assembly protein Eis1	1.11475
SPBC32H8.11	mei4	DNA-binding forkhead transcription factor, meiotic Mei4	1.10833
SPBC17D11.03c	pxp2	carboxymuconolactone decarboxylase-like protein	1.10585
SPBC16A3.02c		mitochondrial CH-OH group oxidoreductase, human RTN4IP1 ortholog, implicated in mitochondrial organization or tethering	1.10168
SPBC16C6.14	spo2	sporulation specific protein Spo2	1.09898
SPAC513.02		phosphoglycerate mutase/6-phosphofructo-2-kinase family	1.0962
SPBC1604.01	egt1	ergothioneine biosynthesis protein Egt1	1.08546
SPAC25H1.09	mde5	glycosyl hydrolase family 13, meiosis specific, Mde5	1.06743
SPCC70.09c	gsr2	1,3-beta-glucan synthesis regulator, Gsr2	1.06416
SPCP31B10.06	tcb2	tricalbin, C2 domain protein (phospholipid binding) ER-plasma membrane tethering protein Tcb2	1.05225
SPCPB1C11.02		amino acid transmembrane transporter	1.04804
SPBC56F2.15	tam13	Schizosaccharomyces specific protein Tam13	1.03501
SPCC1020.10	oca2	serine/threonine protein kinase Oca2	1.02309
SPBC16E9.16c	lsd90	Lsd90 protein	1.02211
SPBC216.04c	mxr2	peptide-methionine (R)-S-oxide reductase MsrB	1.02201
SPBC28E12.06c	lvs1	beige protein homolog Lvs1	1.01734
SPAC637.03		DUF1774 family multi-spanning conserved fungal membrane protein	1.00089

## Sheet: nup211_noncoding_UP
SystematicID	Gene.name	Product	log2FoldChange
SPNCRNA.1144		non-coding RNA	5.00819
SPNCRNA.919		non-coding RNA, possible alternative UTR	3.29485
SPNCRNA.1179		non-coding RNA	2.90008
SPNCRNA.584	lncRNA584	meiosis-specific Smp foci lncRNA	2.68564
SPNCRNA.1055		non-coding RNA, possible alternative UTR	2.38102
SPNCRNA.1023		non-coding RNA, possible alternative UTR	2.31644
SPNCRNA.472		non-coding RNA	2.06137
SPNCRNA.1407		non-coding RNA, possible alternative UTR	2.04348
SPNCRNA.1252		non-coding RNA	1.90474
SPNCRNA.1271		non-coding RNA, possible alternative UTR	1.8904
SPNCRNA.1664		non-coding RNA, possible alternative UTR	1.81495
SPNCRNA.609		non-coding RNA, possible alternative UTR	1.76836
SPNCRNA.1579		non-coding RNA, possible alternative UTR	1.73089
SPNCRNA.1712	nc-pho1	cis-acting regulatory lncRNA prt, pho1 repressing	1.64362
SPNCRNA.103	sme2	meiosis-specific Smp foci lncRNA Sme2, long isoform	1.53028
SPNCRNA.827		non-coding RNA, possible alternative UTR	1.51159
SPNCRNA.605		non-coding RNA	1.44752
SPNCRNA.9001	prt2	cis-acting regulatory lncRNA prt2, pho84 repressing	1.43481
SPNCRNA.1143		non-coding RNA	1.41386
SPNCRNA.1363		non-coding RNA	1.41106
SPNCRNA.802		non-coding RNA	1.40828
SPNCRNA.982		non-coding RNA, possible alternative UTR	1.36973
SPNCRNA.683		non-coding RNA	1.35868
SPNCRNA.739		non-coding RNA	1.3324
SPNCRNA.1523		non-coding RNA, possible alternative UTR	1.31593
SPNCRNA.875		non-coding RNA	1.30795
SPNCRNA.1325	fbp1-ot3	fbp1 upstream regulatory lncRNA c	1.24874
SPSNORNA.20	snR30	small nucleolar RNA U17	1.23071
SPSNORNA.54	snr79	small nucleolar RNA snR79 (predicted)	1.21903
SPNCRNA.1253		non-coding RNA	1.19598
SPNCRNA.1687		non-coding RNA	1.19339
SPNCRNA.887		non-coding RNA	1.19277
SPNCRNA.1698	nc-tgp1	tgp1 sense interfering RNA	1.18005
SPNCRNA.893	SPNCRNA.87	non-coding RNA	1.1694
SPNCRNA.607		non-coding RNA	1.16701
SPNCRNA.1033		non-coding RNA	1.16642
SPNCRNA.513		non-coding RNA	1.15621
SPNCRNA.1070		non-coding RNA	1.1543
SPNCRNA.923		non-coding RNA	1.13906
SPNCRNA.1696	nam3	lncRNA nam3	1.1129
SPSNORNA.50	snR98	box H/ACA small nucleolar RNA snR98	1.11066
SPNCRNA.1367		non-coding RNA, possible alternative UTR	1.10224
SPNCRNA.1585		non-coding RNA	1.0924
SPNCRNA.1003		non-coding RNA	1.05515
SPNCRNA.1662		non-coding RNA, possible alternative UTR	1.04992
SPSNORNA.45	snR93	box H/ACA small nucleolar RNA snR93	1.02172
SPNCRNA.1280		non-coding RNA, possible alternative UTR	1.02067
SPNCRNA.1580		non-coding RNA	1.01843
SPNCRNA.1591		non-coding RNA	1.01398
SPNCRNA.1169		non-coding RNA	1.00394
SPNCRNA.1667		non-coding RNA	1.00231

## Sheet: nup211_coding_DOWN
SystematicID	Gene.name	Product	log2FoldChange
SPBPB8B6.04c	grt1	DNA-binding transcription factor Grt1	-3.57969
SPAC5H10.07		Schizosaccharomyces pombe specific protein	-3.51019
SPBC359.04c	pfl7	cell surface glycoprotein, flocculin Pfl7, DIPSY family	-3.26661
SPBPB21E7.07	aes1	phenazine biosynthesis PhzF protein family	-2.93012
SPBPB10D8.02c		arylsulfatase	-2.71744
SPCC70.08c		methyltransferase	-2.46247
SPAC513.03	mfm2	M-factor precursor Mfm2	-2.25171
SPAC186.06		phenazine biosynthesis PhzF protein family	-2.14099
SPAC227.17c		DUF3128 family, human c22orf39 ortholog	-2.12508
SPAC56F8.13		dubious	-1.98694
SPAC27D7.03c	mei2	RNA-binding protein involved in meiosis Mei2	-1.90811
SPBC1271.07c		N-acetyltransferase	-1.89853
SPBPB10D8.01		cysteine transmembrane transporter	-1.89514
SPBC13A2.04c	ptr2	plasma membrane PTR family peptide transmembrane transporter Ptr2	-1.87842
SPCC1235.14	ght5	plasma membrane high-affinity glucose/fructose:proton symporter Ght5	-1.74577
SPAC5D6.01	rps2202	40S ribosomal protein S15a	-1.60717
SPAC56F8.15		Schizosaccharomyces pombe specific protein	-1.60713
SPCC330.03c		cytochrome b5 reductase	-1.53842
SPBC23G7.15c	rpp202	60S acidic ribosomal protein P2	-1.53476
SPBP4G3.02	pho1	extracellular acid phosphatase Pho1	-1.46392
SPAC8E11.08c		dubious	-1.42088
SPBC26H8.11c	the4	acyl-coenzyme A thioesterase The4	-1.36689
SPBC2A9.14		Schizosaccharomyces specific protein	-1.36533
SPAC11D3.02c		ELLA family acetyltransferase	-1.28838
SPAC1B3.16c	vht1	plasma membrane vitamin H transmembrane transporter Vht1	-1.28769
SPAC23H4.05c		Schizosaccharomyces pombe specific protein	-1.27475
SPAC31G5.09c	spk1	MAP kinase Spk1	-1.26985
SPBC36.03c	mfs3	plasma membrane spermidine transmembrane transporter Mfs3	-1.23959
SPCC622.12c	gdh1	NADP-specific glutamate dehydrogenase Gdh1	-1.23564
SPBC428.02c	eca39	branched chain amino acid aminotransferase Eca39	-1.22553
SPAC13A11.03	mcp7	meiosis specific coiled-coil protein Mcp7	-1.21844
SPAC3H5.05c	rps1401	40S ribosomal protein S14	-1.20665
SPBC29B5.02c	isp4	plasma membrane OPT oligopeptide transmembrane transporter family Isp4	-1.20568
SPAC5H10.06c	adh4	alcohol dehydrogenase Adh4	-1.15594
SPAC31G5.04	lys12	homoisocitrate dehydrogenase Lys12	-1.1535
SPBC23G7.14		Schizosaccharomyces specific protein	-1.11665
SPBC428.11	met17	homocysteine synthase Met17	-1.10958
SPCC1672.03c	gud1	guanine deaminase Gud1	-1.09965
SPCC191.06		Schizosaccharomyces pombe specific protein	-1.09894
SPBC1D7.01	pfd1	prefoldin subunit Pfd1	-1.09752
SPBC428.05c	arg12	argininosuccinate synthase Arg12	-1.09729
SPAC27D7.12c	but1	thioredoxin family protein But1	-1.08494
SPBC2G2.04c	mmf1	mitochondrial matrix protein, YjgF family protein Mmf1, reactive intermediate imine deaminase A homolog Mmf1	-1.05781
SPBC24C6.04	put2	delta-1-pyrroline-5-carboxylate dehydrogenase Put2	-1.04813
SPCC1393.10	ctr4	plasma membrane copper transporter complex subunit Ctr4	-1.03586
SPAC1142.05	ctr5	plasma membrane copper transporter complex subunit Ctr5	-1.02795
SPBC1685.17		Schizosaccharomyces pombe specific protein	-1.02586
SPAC1565.04c	ste4	MAPK cascade adaptor protein Ste4	-1.01909
SPAC30C2.03		Schizosaccharomyces specific protein	-1.00581

## Sheet: nup211_noncoding_DOWN
SystematicID	Gene.name	Product	log2FoldChange
SPNCRNA.130	omt3	meiosis-specific Smp foci lncRNA Omt3	-3.39669
SPNCRNA.1487		non-coding RNA	-2.9036
SPNCRNA.863		non-coding RNA	-2.84147
SPNCRNA.871		non-coding RNA	-2.47409
SPNCRNA.1156		non-coding RNA, possible alternative UTR	-2.44468
SPNCRNA.782		non-coding RNA	-2.33051
SPNCRNA.1309		non-coding RNA	-2.11436
SPNCRNA.1301		non-coding RNA	-2.09437
SPNCRNA.1079		non-coding RNA, possible alternative UTR	-1.94229
SPNCRNA.1277		non-coding RNA	-1.91678
SPNCRNA.1358		non-coding RNA	-1.82201
SPNCRNA.1285		non-coding RNA	-1.79636
SPNCRNA.944		non-coding RNA	-1.79173
SPNCRNA.1078		non-coding RNA, possible alternative UTR	-1.77586
SPNCRNA.840		non-coding RNA	-1.7146
SPNCRNA.1425		non-coding RNA	-1.71296
SPNCRNA.647		non-coding RNA	-1.61358
SPNCRNA.903		non-coding RNA, possible alternative UTR	-1.59659
SPNCRNA.703		non-coding RNA	-1.59537
SPNCRNA.738		non-coding RNA	-1.57906
SPNCRNA.1496		non-coding RNA	-1.54024
SPNCRNA.648		non-coding RNA	-1.53774
SPNCRNA.1015		non-coding RNA	-1.53328
SPNCRNA.781		non-coding RNA	-1.51428
SPNCRNA.1477		non-coding RNA	-1.50994
SPNCRNA.1344		non-coding RNA	-1.49709
SPNCRNA.1063		non-coding RNA, possible alternative UTR	-1.46161
SPNCRNA.888		non-coding RNA, possible alternative UTR	-1.45953
SPNCRNA.1146		non-coding RNA	-1.45628
SPRRNA.52		5.8S ribosomal RNA	-1.45564
SPNCRNA.889		non-coding RNA, possible alternative UTR	-1.44646
SPNCRNA.763		non-coding RNA	-1.44486
SPNCRNA.178		non-coding RNA	-1.42479
SPNCRNA.1251		non-coding RNA, possible alternative UTR	-1.40991
SPNCRNA.613		non-coding RNA	-1.40648
SPNCRNA.779		non-coding RNA	-1.39074
SPNCRNA.1016		non-coding RNA	-1.36885
SPNCRNA.291		non-coding RNA	-1.33581
SPNCRNA.661		non-coding RNA	-1.3348
SPNCRNA.1459	nam1	cis-acting regulatory lncRNA nam1, byr2 repressing	-1.33083
SPNCRNA.733		non-coding RNA	-1.31953
SPNCRNA.388		non-coding RNA	-1.31783
SPNCRNA.873		non-coding RNA	-1.31485
SPNCRNA.1175		non-coding RNA	-1.30325
SPNCRNA.606		non-coding RNA	-1.29341
SPNCRNA.1340		non-coding RNA, possible alternative UTR	-1.21884
SPNCRNA.1510		non-coding RNA, possible alternative UTR	-1.21872
SPNCRNA.832		non-coding RNA, possible alternative UTR	-1.21711
SPNCRNA.1617		non-coding RNA	-1.21658
SPNCRNA.1397		non-coding RNA	-1.19064
SPNCRNA.1524		non-coding RNA	-1.1765
SPNCRNA.1605		non-coding RNA	-1.1732
SPNCRNA.1673		non-coding RNA	-1.16506
SPNCRNA.1599		non-coding RNA	-1.16357
SPNCRNA.1442		non-coding RNA	-1.15867
SPNCRNA.670		non-coding RNA, possible alternative UTR	-1.15274
SPNCRNA.742		non-coding RNA, possible alternative UTR	-1.11864
SPNCRNA.1417		non-coding RNA	-1.09349
SPNCRNA.732		non-coding RNA, possible alternative UTR	-1.08343
SPNCRNA.1636		non-coding RNA	-1.07955
SPNCRNA.1595		non-coding RNA	-1.07356
SPNCRNA.713		non-coding RNA	-1.07356
SPNCRNA.111	rse1	cis-acting lincRNA Ste11 repressor	-1.07049
SPNCRNA.1130		non-coding RNA	-1.06215
SPNCRNA.756		non-coding RNA	-1.03727
SPNCRNA.1034		non-coding RNA	-1.02685
SPNCRNA.1031		non-coding RNA	-1.02345
