# Supplementary material
Source: HighWire-hosted journal article supplement (doi:10.1101/rna.081007.126)
Supplement: Supplemental_TableS2_rsm_RNAseq.xlsx [file Supplemental_TableS2_rsm_RNAseq.xlsx]

## Sheet: rsm1_coding_UP
SystematicID	Gene.name	Product	log2FoldChange
SPAC1F8.02c	shu1	cell-surface heme acquisition protein Shu1	6.05472
SPAC1F8.03c	str3	plasma membrane heme transmembrane transporter Str3	5.90417
SPBC4F6.09	str1	plasma membrane siderophore-iron transmembrane transporter Str1	3.73856
SPAPB1A11.05	sap49	U2 snRNP-associated RNA-binding protein Sap49	3.44112
SPCC18B5.02c		cinnamoyl-CoA reductase pseudogene	3.30348
SPCC965.07c	gst2	glutathione S-transferase Gst2	3.07326
SPBC106.02c	srx1	sulfiredoxin	2.97337
SPBC23G7.10c		NADH-dependent flavin oxidoreductase, implicated in cellular detoxification from family members	2.94934
SPAC1F7.08	fio1	plasma membrane iron transport multicopper oxidase Fio1	2.93585
SPCC663.08c		short chain dehydrogenase, unknown specificity	2.91558
SPCC663.06c	osr1	short chain dehydrogenase, unknown specificity	2.76237
SPAC2F7.06c	pol4	DNA polymerase X family	2.75464
SPAC1F7.07c	fip1	plasma membrane iron transmembrane transporter Fip1	2.64296
SPBC1683.09c	frp1	plasma membrane ferric-chelate reductase Frp1	2.51266
SPAC27D7.09c		But2 family protein, similar to cell surface molecules	2.44231
SPAC23H3.15c	ddr48	DNA damage-responsive protein Ddr48	2.43264
SPAC4H3.08	fox2	3-hydroxyacyl-CoA dehydrogenase	2.30342
SPBC609.04	caf5	plasma membrane spermine family transmembrane transporter Caf5	2.30082
SPBC609.01		cytoplasmic P body 3'-5'-exoribonuclease, Dis3L2-related	2.28989
SPBC19C7.04c	gsr1	1,3-beta-glucan synthesis regulator, Gsr1	2.23427
SPCC1223.13	cbf12	DNA-binding transcription factor, CBF1/Su(H)/LAG-1 family Cbf12	2.18398
SPBC8E4.12c	ecl3	extender of chronological lifespan protein Ecl3	2.16735
SPCC338.18		Schizosaccharomyces pombe specific protein	2.15821
SPAC1F8.04c	hhy1	hydrolase Hhy1	2.14022
SPAC29A4.12c	mug108	Schizosaccharomyces specific protein Mug108	2.10495
SPAC9E9.09c	atd1	aldehyde dehydrogenase	2.09243
SPBC359.06	mug14	adducin, involved in actin cytoskeleton organization	2.06628
SPBC9B6.03	pib2	zf-FYVE type zinc finger protein, involved in endosomal transport	2.03696
SPCC1840.12	opt3	OPT oligopeptide transmembrane transporter family protein Opt3	2.01992
SPAC977.13c		hydrolase, pseudogene (4 frameshifts)	2.0164
SPAC22F3.02	atf31	DNA-binding transcription factor Atf31	2.00923
SPCC794.03		plasma membrane amino acid derivative transmembrane transporter	1.98851
SPCC737.04		UPF0300 family protein 6	1.98604
SPAC4H3.03c		glucan 1,4-alpha-glucosidase	1.93225
SPAC25H1.09	mde5	alpha-amylase homolog Mde5	1.90294
SPAPJ695.02		Schizosaccharomyces pombe specific protein	1.8533
SPCC1322.03	trp1322	plasma membrane TRP-like calcium ion channel Trp1322	1.85071
SPAC139.05	ssd2	succinate-semialdehyde dehydrogenase	1.84227
SPBC56F2.06	mug147	Schizosaccharomyces specific protein Mug147	1.80001
SPBP4H10.10	rbd3	mitochondrial rhomboid family protease	1.79883
SPAC5H10.04		NADPH dehydrogenase, (Old yellow enzyme) involved in small alpha,beta-unsaturated carbonyl compounds	1.74373
SPAPB1A11.01	mfc1	prospore membrane copper transmembrane transporter Mfc1	1.74204
SPAC1039.02	efn2	extracellular 5'-nucleotidase, human NT5E family	1.7187
SPBC32H8.02c	nep2	NEDD8 protease Nep2	1.70089
SPBC24C6.09c		phosphoketolase family protein	1.69478
SPAPJ691.02	moh1	yippee-like protein, Moh1	1.67557
SPAC750.01		NADP-dependent aldo/keto reductase, unknown biological role, implicated in cellular detoxification	1.64509
SPCC1393.10	ctr4	plasma membrane copper transporter complex subunit Ctr4	1.60516
SPAC31G5.06	rrg8	mitochondrial conserved fungal protein Rrg8	1.56022
SPBC1773.06c	adh8	alcohol dehydrogenase	1.55903
SPBC354.12	gpd3	glyceraldehyde 3-phosphate dehydrogenase Gpd3	1.55788
SPAC9E9.11	plr1	pyridoxal reductase Plr1	1.55396
SPBPB21E7.04c	cmt2	O-methyltransferase, human COMT catechol homolog 2	1.55337
SPBC365.12c	ish1	nuclear envelope Ish domain protein Ish1	1.54993
SPAC25B8.13c	isp7	2-OG-Fe(II) oxygenase superfamily protein	1.5448
SPCPB16A4.06c		Schizosaccharomyces specific protein	1.53957
SPCC18B5.01c	bfr1	plasma membrane brefeldin A efflux transporter Bfr1	1.53166
SPAPB24D3.08c		NADP-dependent oxidoreductase, implicated in cellular detoxification	1.52317
SPBC1685.13	fhn1	eisosome assembly protein Fhn1	1.5056
SPBC23G7.04c	nif1	SEL1/TPR repeat protein, protein kinase inhibitor Nif1	1.49547
SPAP8A3.04c	hsp9	heat shock protein Hsp9	1.48708
SPAC977.16c	dak2	dihydroxyacetone kinase Dak2	1.47771
SPBC215.11c		aldo/keto reductase, unknown biological role	1.46552
SPAC6G10.03c		lysophospholipid acyltransferase	1.46401
SPCC18B5.03	wee1	M phase inhibitor protein kinase Wee1	1.46286
SPCC2H8.02	pho843	plasma membrane inorganic phosphate transmembrane transporter Pho843	1.45922
SPBC16E9.16c	lsd90	Lsd90 protein	1.44906
SPAC19G12.09		mycotoxin detoxification NADH/NADPH-dependent acetaldehyde reductase	1.44439
SPBC3E7.02c	hsp16	heat shock protein Hsp16	1.43681
SPAC1002.19	urg1	GTP cyclohydrolase II Urg1	1.4324
SPAC29B12.14c		plasma membrane purine transmembrane transporter	1.4298
SPAC23C11.06c		vacuolar membrane hydrolase, implicted in protein catabolism	1.42866
SPAC3H1.11	hsr1	DNA-binding transcription factor Hsr1	1.42392
SPAC17A2.09c	csx1	RNA-binding protein Csx1	1.41161
SPBC3H7.02	sul1	sulfate transmembrane transporter Sul1	1.39964
SPAC513.02		phosphoglycerate mutase/6-phosphofructo-2-kinase family	1.39609
SPAC2H10.01		DNA-binding transcription factor, zf-fungal binuclear cluster type	1.38458
SPCC1235.18		dubious	1.36638
SPBC530.11c		DNA-binding transcription factor, zf-fungal binuclear cluster type	1.3649
SPAC343.12	rds1	ferritin related conserved fungal protein	1.35563
SPAPB24D3.07c		glycosyl hydrolase (predicted by Pfam-N)	1.34475
SPAC22F8.02c	pvg5	Golgi 4,6-pyruvylated galactose (PvGal) residue biosynthesis protein Pvg5	1.33163
SPBC2A9.02		NADH-dependent glycolaldehyde/furfural/butyraldehyde/propylaldehydealdehyde reductase	1.3232
SPAC2F7.11	nrd1	RNA-binding protein Nrd1	1.32165
SPAC22H10.13	zym1	metallothionein Zym1	1.31987
SPCC1235.14	ght5	plasma membrane high-affinity glucose/fructose:proton symporter Ght5	1.31355
SPBC839.06	cta3	P-type ATPase, potassium exporting Cta3	1.3094
SPAC1A6.08c	mug125	Schizosaccharomyces specific protein Mug125	1.29994
SPCC794.04c		transmembrane transporter	1.29816
SPBC56F2.15	tam13	Schizosaccharomyces specific protein Tam13	1.293
SPAC227.13c	isu1	mitochondrial [2Fe-2S] cluster assembly protein Isu1	1.2821
SPAC32A11.02c		DUF4449 family conserved fungal protein, involved in cell-cell communication in N. crassa	1.28017
SPAC3C7.06c	pit1	serine/threonine protein kinase, meiotic, STKc MAK-like Pit1	1.27747
SPBPB2B2.05		class I glutamine amidotransferase family protein	1.27324
SPAC637.03		DUF1774 family multi-spanning conserved fungal membrane protein	1.26005
SPBC30B4.01c	wsc1	plasma membrane-associated serine-rich cell wall sensor Wsc1	1.25352
SPAC29A4.11	rga3	RhoGAP, GTPase activating protein Rga3	1.24698
SPCC4G3.10c	rhp42	DNA repair protein Rhp42	1.24584
SPBC1105.14	rsv2	DNA-binding transcription factor Rsv2	1.24262
SPAC31G5.07	dni1	tetraspan protein, claudin Dni1	1.23941
SPBC19F5.01c	puc1	G1 cyclin Puc1	1.23792
SPBC1604.01	egt1	ergothioneine biosynthesis protein Egt1	1.23657
SPAC56F8.16	esc1	DNA-binding transcription factor Esc1	1.23383
SPAC1F8.06	pfl8	cell surface glycoprotein, flocculin Pfl8	1.22303
SPAC8C9.03	cgs1	cAMP-dependent protein kinase regulatory subunit Cgs1	1.21516
SPCC576.16c	wtf22	wtf element Wtf22 (frameshifted)	1.21331
SPBC17F3.01c	rga5	RhoGAP, GTPase activating protein Rga5	1.20926
SPAC23H3.13c	gpa2	heterotrimeric G protein alpha-2 subunit Gpa2	1.20843
SPAC13G7.13c	msa1	RNA-binding protein Msa1	1.2083
SPBC32H8.11	mei4	DNA-binding forkhead transcription factor, meiotic Mei4	1.20143
SPAC1783.01		methionine synthase reductase	1.20119
SPAC4G8.03c	puf5	pumilio family RNA-binding protein Puf5	1.18521
SPAPB24D3.10c	agl1	maltose alpha-glucosidase Agl1	1.18503
SPCC320.03		DNA-binding transcription factor	1.18021
SPAPB1A10.14	pof15	F-box protein	1.17126
SPAC1399.01c		nucleobase transmembrane transporter	1.16874
SPAC19D5.01	pyp2	protein tyrosine phosphatase Pyp2	1.1558
SPAC26F1.04c	etr1	enoyl-[acyl-carrier protein] reductase	1.14926
SPAC1D4.11c	lkh1	dual specificity protein kinase Lkh1	1.1457
SPAC1687.22c	puf3	pumilio family RNA-binding protein Puf3	1.14494
SPCP31B10.06	tcb2	tricalbin, C2 domain protein (phospholipid binding) ER-plasma membrane tethering protein Tcb2	1.13743
SPBC18H10.05		WD repeat protein, human WDR44 family	1.13569
SPAC6B12.02c	mus7	DNA repair protein Mus7/Mms22	1.11751
SPBC16D10.05	mok13	alpha-1,3-glucan synthase Mok13	1.1135
SPBC25B2.08		Schizosaccharomyces pombe specific protein	1.11145
SPACUNK4.16c	tps3	alpha,alpha-trehalose-phosphate synthase	1.11076
SPCC1450.11c	cek1	serine/threonine protein kinase Cek1	1.1089
SPBC56F2.05c		DNA-binding transcription factor	1.10567
SPCC191.11	inv1	external invertase, beta-fructofuranosidase Inv1	1.10414
SPBC15D4.02	gsf1	DNA-binding transcription factor, zf-fungal binuclear cluster type Gsf1	1.09799
SPAC3G9.11c	pdc201	pyruvate decarboxylase	1.09447
SPBC16A3.02c		mitochondrial CH-OH group oxidoreductase, human RTN4IP1 ortholog, implicated in mitochondrial organization or tethering	1.09097
SPAC13D6.01	pof14	F-box protein Pof14	1.08175
SPBC21C3.19	rtc3	SBDS family protein Rtc3	1.07952
SPAC3A11.04	sei1	ER-associated lipid droplet biogenesis protein, seipin Sei1	1.07907
SPCC1450.01c		pseudogene	1.07772
SPAC22G7.08	ppk8	serine/threonine protein kinase Ppk8	1.07729
SPAC25B8.19c	loz1	DNA-binding transcription factor zf-C2H2 type	1.06623
SPAC1142.05	ctr5	plasma membrane copper transporter complex subunit Ctr5	1.06585
SPBC16D10.08c	hsp104	heat shock protein, disaggregase Hsp104	1.06582
SPAC22E12.11c	set3	histone lysine methyltransferase Set3	1.0653
SPAC26F1.11		dubious	1.06454
SPAC2E1P3.01		dehydrogenase	1.05238
SPBC16E9.01c	php4	CCAAT-binding factor complex repressor Php4	1.05223
SPAC27F1.04c	nuf2	NMS complex subunit Nuf2	1.05148
SPAC23E2.03c	sms1	pheromone-MAPK scaffold Sms1	1.0506
SPBC947.04	pfl3	cell surface glycoprotein, flocculin Pfl3, DIPSY family	1.04509
SPBC1683.01	pho841	plasma membrane inorganic phosphate transmembrane transporter Pho841	1.04105
SPBC29B5.01	atf1	DNA-binding transcription factor, Atf-CREB family Atf1	1.03747
SPAC11D3.01c		Con-6 family conserved fungal protein	1.03723
SPCC1020.10	oca2	serine/threonine protein kinase Oca2	1.03532
SPBC36.02c		spermidine family transmembrane transporter	1.03385
SPBC336.03	efc25	Ras1 GEF Efc25	1.0315
SPBC1198.14c	fbp1	fructose-1,6-bisphosphatase Fbp1	1.02351
SPAC1F8.01	ght3	plasma membrane gluconate:proton symporter Ght3	1.01769
SPBC1271.10c		transmembrane transporter	1.01637
SPBC19C2.05	pat1	serine/threonine protein kinase Ran1/Pat1	1.0099
SPCC162.04c	wtf13	wtf meiotic drive antidote Wtf13	1.00493

## Sheet: rsm1_noncoding_UP
SystematicID	Gene.name	Product	log2FoldChange
SPNCRNA.584	lncRNA584	meiosis-specific Smp foci lncRNA	2.72407
SPNCRNA.1023		non-coding RNA, possible alternative UTR	2.62762
SPNCRNA.1664		non-coding RNA, possible alternative UTR	2.46332
SPNCRNA.1179		non-coding RNA	2.43161
SPNCRNA.1407		non-coding RNA, possible alternative UTR	2.36592
SPNCRNA.605		non-coding RNA	2.32043
SPNCRNA.9001	prt2	cis-acting regulatory lncRNA prt2, pho84 repressing	2.3059
SPNCRNA.1055		non-coding RNA, possible alternative UTR	2.23982
SPNCRNA.1137		non-coding RNA	2.1952
SPNCRNA.1579		non-coding RNA, possible alternative UTR	2.00648
SPNCRNA.1712	nc-pho1	cis-acting regulatory lncRNA prt, pho1 repressing	2.00584
SPNCRNA.1276		non-coding RNA	1.98289
SPNCRNA.1523		non-coding RNA, possible alternative UTR	1.94455
SPNCRNA.1508		non-coding RNA	1.91801
SPNCRNA.986		non-coding RNA, possible alternative UTR	1.82764
SPNCRNA.1271		non-coding RNA, possible alternative UTR	1.8209
SPNCRNA.690		non-coding RNA	1.79056
SPNCRNA.1280		non-coding RNA, possible alternative UTR	1.73599
SPNCRNA.1252		non-coding RNA	1.65615
SPNCRNA.893	SPNCRNA.87	non-coding RNA	1.63513
SPNCRNA.609		non-coding RNA, possible alternative UTR	1.54998
SPNCRNA.103	sme2	meiosis-specific Smp foci lncRNA Sme2, long isoform	1.51358
SPNCRNA.827		non-coding RNA, possible alternative UTR	1.48511
SPNCRNA.1033		non-coding RNA	1.45673
SPSNORNA.54	snr79	small nucleolar RNA snR79 (predicted)	1.44941
SPNCRNA.887		non-coding RNA	1.41654
SPNCRNA.739		non-coding RNA	1.41523
SPNCRNA.990		non-coding RNA	1.39747
SPNCRNA.1435		non-coding RNA	1.37477
SPSNORNA.47	snR95	box H/ACA small nucleolar RNA snR95	1.35932
SPNCRNA.1687		non-coding RNA	1.35841
SPNCRNA.1696	nam3	lncRNA nam3	1.35345
SPNCRNA.472		non-coding RNA	1.32714
SPNCRNA.322		non-coding RNA	1.32079
SPNCRNA.1494		non-coding RNA, possible alternative UTR	1.30802
SPNCRNA.802		non-coding RNA	1.29993
SPNCRNA.1318		non-coding RNA	1.28249
SPNCRNA.716		non-coding RNA	1.27157
SPNCRNA.1253		non-coding RNA	1.26336
SPNCRNA.1601		non-coding RNA, possible alternative UTR	1.26007
SPSNORNA.20	snR30	small nucleolar RNA U17	1.24333
SPNCRNA.683		non-coding RNA	1.24183
SPNCRNA.607		non-coding RNA	1.22788
SPNCRNA.875		non-coding RNA	1.20742
SPNCRNA.1169		non-coding RNA	1.18909
SPNCRNA.810		non-coding RNA	1.18338
SPNCRNA.242		non-coding RNA	1.17252
SPNCRNA.1698	nc-tgp1	tgp1 sense interfering RNA	1.15527
SPNCRNA.1447		non-coding RNA	1.13432
SPNCRNA.1473		non-coding RNA	1.12996
SPNCRNA.1570		non-coding RNA, possible alternative UTR	1.11943
SPNCRNA.1557		non-coding RNA	1.085
SPSNORNA.50	snR98	box H/ACA small nucleolar RNA snR98	1.08061
SPNCRNA.1363		non-coding RNA	1.05486
SPNCRNA.1050		non-coding RNA, possible alternative UTR	1.05107
SPNCRNA.815		non-coding RNA	1.02887
SPNCRNA.1273		non-coding RNA	1.02789
SPNCRNA.1478		non-coding RNA	1.02522
SPNCRNA.1686		non-coding RNA	1.01983
SPNCRNA.838		non-coding RNA	1.01771
SPNCRNA.968		non-coding RNA, possible alternative UTR	1.01662
SPNCRNA.666		non-coding RNA	1.01628
SPSNORNA.40	snR42	box H/ACA small nucleolar RNA snR42	1.01112

## Sheet: rsm1_coding_DOWN
SystematicID	Gene.name	Product	log2FoldChange
SPBPB8B6.04c	grt1	DNA-binding transcription factor Grt1	-3.49801
SPBPB21E7.07	aes1	phenazine biosynthesis PhzF protein family	-2.53508
SPBP4G3.02	pho1	extracellular acid phosphatase Pho1	-2.22578
SPAC227.17c		DUF3128 family, human c22orf39 ortholog	-2.22032
SPCC330.03c		cytochrome b5 reductase	-2.21877
SPBC359.04c	pfl7	cell surface glycoprotein, flocculin Pfl7, DIPSY family	-1.94193
SPCP20C8.02c		S. pombe specific UPF0321 family protein 1	-1.9302
SPAC186.06		phenazine biosynthesis PhzF protein family	-1.92888
SPAC5H10.07		Schizosaccharomyces pombe specific protein	-1.8799
SPAC186.01	pfl9	cell surface glycoprotein, flocculin Pfl9, DIPSY family	-1.85135
SPCP20C8.03		pseudogene	-1.83624
SPAC5D6.01	rps2202	40S ribosomal protein S15a	-1.72106
SPBPB10D8.01		plasma membrane cysteine transmembrane transporter	-1.69559
SPBC1271.07c		N-acetyltransferase	-1.68796
SPBC1D7.01	pfd1	prefoldin subunit Pfd1	-1.65887
SPAC8E11.08c		dubious	-1.57845
SPCC1919.13c	bmt5	rRNA (uridine-N3-)-methyltransferase Bmt5	-1.51863
SPBPB10D8.02c		arylsulfatase	-1.48177
SPCC645.02	gep4	phosphatidylglycerol phosphate phosphatase Gep4	-1.45408
SPBC1709.06	dus2	tRNA/mRNA dihydrouridine synthase Dus2	-1.45182
SPAC1039.10	mmf2	mitochondrial matrix protein, YjgF family protein Mmf2, reactive intermediate imine deaminase A homolog	-1.42215
SPAC513.03	mfm2	M-factor precursor Mfm2	-1.34623
SPAC1071.12c	stp1	protein tyrosine phosphatase Stp1, unknown biological role	-1.34549
SPCC1322.07c	mug150	Schizosaccharomyces pombe specific protein Mug150	-1.33615
SPCC188.12	spn6	meiotic (sporulation) septin Spn6	-1.3172
SPCC70.08c		methyltransferase	-1.26319
SPAC23H4.05c		Schizosaccharomyces pombe specific protein	-1.25588
SPCC736.09c	tfx1	TRAX	-1.25252
SPAC644.10	med11	mediator complex subunit Med11	-1.24743
SPBC24C6.04	put2	delta-1-pyrroline-5-carboxylate dehydrogenase Put2	-1.24159
SPAC5D6.05	med18	mediator complex subunit Med18	-1.2156
SPAC23C4.04c		Schizosaccharomyces pombe specific protein	-1.20951
SPAC3H5.05c	rps1401	40S ribosomal protein S14	-1.18714
SPCC1884.01		Schizosaccharomyces pombe specific protein	-1.15012
SPCC191.06		Schizosaccharomyces pombe specific protein	-1.13156
SPBC530.02		transmembrane transporter	-1.12604
SPAC16E8.14c	tae1	ribosomal protein AdoMet-dependent proline dimethyltransferase Tae1	-1.12371
SPAC1B2.06		Schizosaccharomyces pombe specific protein	-1.11644
SPBC19F5.02c	utp4	U3 snoRNP-associated WD repeat protein Utp4	-1.11542
SPAC5H10.06c	adh4	alcohol dehydrogenase Adh4	-1.11351
SPAC11D3.02c		ELLA family acetyltransferase	-1.11144
SPAC694.04c		nuclear/mitochondrial metal-dependent protein hydrolase, human MYG1 ortholog	-1.10979
SPBC713.05	wdr83	Gpl1-Gih35-Wdr83 complex WD repeat subunit Wdr83	-1.1001
SPAC589.11	pth4	mitochondrial translation release factor	-1.08688
SPAC22F3.15	aim41	mitochondrial aspartyl/glutamyl-tRNA amidotransferase subunit B-related Aim41	-1.07512
SPBPB21E7.09		L-asparaginase	-1.06383
SPAC27F1.03c	uch1	ubiquitin C-terminal hydrolase Uch1	-1.05523
SPAPJ760.03c	adg1	Schizosaccharomyces specific protein Adg1	-1.05197
SPAC27E2.03c		Obg-like ATPase, human OLA1 ortholog	-1.04948
SPBC146.08c	tif1102	translation initiation factor eIF1A-like	-1.04922
SPCC594.03		Schizosaccharomyces pombe specific protein	-1.04331
SPAC222.17		conserved fungal protein	-1.03707
SPCC576.17c		pyridoxamine/pyridoxine/pyridoxal transmembrane transporter	-1.03509
SPAC23C4.06c	efm6	translation elongation factor EF-1 alpha (eEF1A) lysine 390 methylase Efm6	-1.03362
SPACUNK4.20		dubious	-1.01939
SPAC17A5.13	fol2	GTP cyclohydrolase Fol2	-1.00508
SPAC1B3.04c	guf1	mitochondrial elongation factor GTPase Guf1	-1.00491
SPCC330.07c		transmembrane transporter	-1.00373

## Sheet: rsm1_noncoding_DOWN
SystematicID	Gene.name	Product	log2FoldChange
SPNCRNA.1309		non-coding RNA	-2.91468
SPNCRNA.1425		non-coding RNA	-2.7645
SPNCRNA.1301		non-coding RNA	-2.64861
SPNCRNA.178		non-coding RNA	-2.50879
SPNCRNA.291		non-coding RNA	-2.07078
SPNCRNA.1487		non-coding RNA	-2.03924
SPNCRNA.1016		non-coding RNA	-1.9824
SPNCRNA.1078		non-coding RNA, possible alternative UTR	-1.94888
SPNCRNA.903		non-coding RNA, possible alternative UTR	-1.92089
SPNCRNA.832		non-coding RNA, possible alternative UTR	-1.91809
SPNCRNA.733		non-coding RNA	-1.88329
SPNCRNA.1096		non-coding RNA	-1.87815
SPNCRNA.1397		non-coding RNA	-1.82134
SPNCRNA.1156		non-coding RNA, possible alternative UTR	-1.74516
SPNCRNA.1477		non-coding RNA	-1.70623
SPNCRNA.840		non-coding RNA	-1.70057
SPNCRNA.804		non-coding RNA, possible alternative UTR	-1.68008
SPNCRNA.1146		non-coding RNA	-1.68005
SPNCRNA.1560		non-coding RNA	-1.6794
SPNCRNA.1635		non-coding RNA	-1.59674
SPNCRNA.1251		non-coding RNA, possible alternative UTR	-1.57364
SPNCRNA.661		non-coding RNA	-1.5647
SPNCRNA.1459	nam1	cis-acting regulatory lncRNA nam1, byr2 repressing	-1.50495
SPNCRNA.763		non-coding RNA	-1.47844
SPNCRNA.1692		non-coding RNA	-1.43512
SPNCRNA.1316		non-coding RNA	-1.39636
SPNCRNA.1130		non-coding RNA	-1.38637
SPNCRNA.1496		non-coding RNA	-1.37201
SPNCRNA.863		non-coding RNA	-1.36495
SPNCRNA.1277		non-coding RNA	-1.34707
SPNCRNA.1510		non-coding RNA, possible alternative UTR	-1.32745
SPNCRNA.916		non-coding RNA	-1.30643
SPNCRNA.1034		non-coding RNA	-1.28603
SPNCRNA.721		non-coding RNA, possible alternative UTR	-1.24161
SPNCRNA.871		non-coding RNA	-1.23943
SPNCRNA.1524		non-coding RNA	-1.22758
SPNCRNA.1073		non-coding RNA	-1.21895
SPNCRNA.1636		non-coding RNA	-1.21124
SPNCRNA.907		non-coding RNA	-1.16947
SPNCRNA.1008		non-coding RNA	-1.15905
SPNCRNA.1285		non-coding RNA	-1.1551
SPNCRNA.1296		non-coding RNA	-1.14096
SPNCRNA.1344		non-coding RNA	-1.13767
SPNCRNA.947		non-coding RNA	-1.13637
SPNCRNA.1184		non-coding RNA	-1.13128
SPNCRNA.1334		non-coding RNA	-1.11638
SPNCRNA.709		non-coding RNA	-1.11533
SPNCRNA.1015		non-coding RNA	-1.11355
SPNCRNA.1139		non-coding RNA	-1.10361
SPNCRNA.1466		non-coding RNA	-1.10042
SPNCRNA.854		non-coding RNA	-1.0896
SPNCRNA.42	prl42	non-coding RNA, poly(A)-bearing	-1.08955
SPNCRNA.851		non-coding RNA	-1.08622
SPNCRNA.128	rrk1	RNase P K-RNA	-1.08581
SPNCRNA.1358		non-coding RNA	-1.07185
SPNCRNA.1413		non-coding RNA, possible alternative UTR	-1.07173
SPNCRNA.1615		non-coding RNA	-1.0564
SPNCRNA.898		non-coding RNA	-1.05193
SPSNORNA.52	snR101	box H/ACA small nucleolar RNA snR101	-1.05071
SPNCRNA.1417		non-coding RNA	-1.04382
SPNCRNA.647		non-coding RNA	-1.04245
SPNCRNA.756		non-coding RNA	-1.01073
SPNCRNA.1175		non-coding RNA	-1.00506
SPNCRNA.761		non-coding RNA	-1.00123
