# Supplementary material
Source: HighWire-hosted journal article supplement (doi:10.1101/rna.081007.126)
Supplement: Supplemental_TableS3_RNA.xlsx [file Supplemental_TableS3_RNA.xlsx]

## Sheet: common_coding_UP
Systematic ID	Gene name	Product description	nup211-1435*	rsm1∆
SPCC18B5.02c		cinnamoyl-CoA reductase pseudogene	4.78216	3.30348
SPCC663.08c		short chain dehydrogenase, unknown specificity	4.39406	2.91558
SPCC663.06c	osr1	short chain dehydrogenase, unknown specificity	4.26923	2.76237
SPCC965.07c	gst2	glutathione S-transferase Gst2	4.05734	3.07326
SPAC750.01		NADP-dependent aldo/keto reductase, unknown biological role, implicated in cellular detoxification	3.5778	1.64509
SPBC23G7.10c		NADH-dependent flavin oxidoreductase, implicated in cellular detoxification from family members	2.76409	2.94934
SPBPB21E7.04c	cmt2	O-methyltransferase, human COMT catechol homolog 2	2.65161	1.55337
SPBC609.04	caf5	plasma membrane spermine family transmembrane transporter Caf5	2.64312	2.30082
SPBC4F6.09	str1	plasma membrane siderophore-iron transmembrane transporter Str1	2.60914	3.73856
SPBC106.02c	srx1	sulfiredoxin	2.57318	2.97337
SPAC27D7.09c		But2 family protein, similar to cell surface molecules	2.55328	2.44231
SPCC737.04		UPF0300 family protein 6	2.54776	1.98604
SPBC215.11c		aldo/keto reductase, unknown biological role	2.53242	1.46552
SPAPB24D3.08c		NADP-dependent oxidoreductase, implicated in cellular detoxification	2.2725	1.52317
SPCC18B5.01c	bfr1	plasma membrane brefeldin A efflux transporter Bfr1	2.25981	1.53166
SPAC1F7.08	fio1	plasma membrane iron transport multicopper oxidase Fio1	2.12548	2.93585
SPBC609.01		cytoplasmic P body 3'-5'-exoribonuclease, Dis3L2-related	2.10698	2.28989
SPAPB1A11.05	sap49	U2 snRNP-associated RNA-binding protein Sap49	2.09245	3.44112
SPAC9E9.11	plr1	pyridoxal reductase Plr1	2.07621	1.55396
SPAC9E9.09c	atd1	aldehyde dehydrogenase	2.04516	2.09243
SPBC8E4.12c	ecl3	extender of chronological lifespan protein Ecl3	1.98828	2.16735
SPAC1039.02	efn2	extracellular 5'-nucleotidase, human NT5E family Efn2	1.98	1.7187
SPAC22F3.02	atf31	DNA-binding transcription factor Atf31	1.78684	2.00923
SPAC2F7.06c	pol4	DNA polymerase X family	1.77453	2.75464
SPAC1F7.07c	fip1	plasma membrane iron transmembrane transporter Fip1	1.75424	2.64296
SPAC6G10.03c		lysophospholipid acyltransferase	1.74672	1.46401
SPBC1685.13	fhn1	eisosome assembly protein Fhn1	1.60556	1.5056
SPAC29A4.11	rga3	RhoGAP Rga3	1.59844	1.24698
SPBC2A9.02		NADH-dependent glycolaldehyde/furfural/butyraldehyde/propylaldehydealdehyde reductase	1.56214	1.3232
SPBC56F2.06	mug147	Schizosaccharomyces specific protein Mug147	1.55817	1.80001
SPAC31G5.06	rrg8	mitochondrial tRNA 5'-end processing protein Rrg8	1.54689	1.56022
SPBC19C7.04c	gsr1	1,3-beta-glucan synthesis regulator, Gsr1	1.493	2.23427
SPCC1840.12	opt3	OPT oligopeptide transmembrane transporter family protein Opt3	1.48346	2.01992
SPAPB24D3.07c		glycosyl hydrolase (predicted by Pfam-N)	1.46232	1.34475
SPAPB1A11.01	mfc1	prospore membrane copper transmembrane transporter Mfc1	1.46104	1.74204
SPAC977.13c		hydrolase, pseudogene (4 frameshifts)	1.45366	2.0164
SPAC19G12.09		mycotoxin detoxification NADH/NADPH-dependent acetaldehyde reductase	1.44833	1.44439
SPAC6B12.02c	mus7	DNA repair protein Mus7/Mms22	1.44814	1.11751
SPAC26F1.04c	etr1	enoyl-[acyl-carrier protein] reductase	1.42979	1.14926
SPBC1198.14c	fbp1	fructose-1,6-bisphosphatase Fbp1	1.42243	1.02351
SPBC23G7.04c	nif1	SEL1/TPR repeat protein, protein kinase inhibitor Nif1	1.4173	1.49547
SPAC4H3.08	fox2	3-hydroxyacyl-CoA dehydrogenase, Fox2	1.40222	2.30342
SPAC23H3.15c	ddr48	DNA damage-responsive protein Ddr48	1.38372	2.43264
SPBC24C6.09c		phosphoketolase family protein	1.38361	1.69478
SPBC16D10.05	mok13	cell wall alpha-1,3-glucan synthase Mok13	1.3676	1.1135
SPBC1773.06c	adh8	zinc binding alcohol dehydrogenase family, unknown pathway	1.3423	1.55903
SPAC8C9.03	cgs1	cAMP-dependent protein kinase regulatory subunit Cgs1	1.33191	1.21516
SPCC1322.03	trp1322	plasma membrane TRP-like calcium ion channel Trp1322	1.29559	1.85071
SPCC1223.13	cbf12	DNA-binding transcription factor, CBF1/Su(H)/LAG-1 family Cbf12	1.27348	2.18398
SPAC5H10.04		NADPH dehydrogenase, (Old yellow enzyme) involved in small alpha,beta-unsaturated carbonyl compounds	1.25154	1.74373
SPCC2H8.02	pho843	plasma membrane inorganic phosphate transmembrane transporter Pho843	1.23962	1.45922
SPAPJ691.02	moh1	yippee-like protein, Moh1	1.21195	1.67557
SPBC365.12c	ish1	nuclear envelope Ish domain protein Ish1	1.19589	1.54993
SPAC31G5.07	dni1	tetraspan protein, claudin Dni1	1.19211	1.23941
SPBP4H10.10	rbd3	mitochondrial rhomboid family peptidase Rbd3	1.18614	1.79883
SPBC9B6.03	pib2	zf-FYVE type zinc finger protein and glutamine sensor Pib2	1.18516	2.03696
SPBC354.12	gpd3	glyceraldehyde 3-phosphate dehydrogenase Gpd3	1.17819	1.55788
SPAC23C11.06c		vacuolar membrane hydrolase, implicted in protein catabolism or lipid metabolism	1.17225	1.42866
SPBC16D10.08c	hsp104	heat shock protein, disaggregase Hsp104	1.1451	1.06582
SPCC338.18		Schizosaccharomyces pombe specific protein	1.13861	2.15821
SPAC1A6.08c	mug125	Schizosaccharomyces specific protein Mug125	1.13793	1.29994
SPCC794.03		plasma membrane amino acid derivative transmembrane transporter	1.11496	1.98851
SPBC32H8.11	mei4	DNA-binding forkhead transcription factor, meiotic Mei4	1.10833	1.20143
SPBC16A3.02c		mitochondrial CH-OH group oxidoreductase, human RTN4IP1 ortholog, implicated in isoprenoid or sterol metabolism	1.10168	1.09097
SPAC513.02		phosphoglycerate mutase/6-phosphofructo-2-kinase family	1.0962	1.39609
SPBC1604.01	egt1	ergothioneine biosynthesis protein Egt1	1.08546	1.23657
SPAC25H1.09	mde5	glycosyl hydrolase family 13, meiosis specific, Mde5	1.06743	1.90294
SPCP31B10.06	tcb2	tricalbin, C2 domain protein (phospholipid binding) ER-plasma membrane tethering protein Tcb2	1.05225	1.13743
SPBC56F2.15	tam13	Schizosaccharomyces specific protein Tam13	1.03501	1.293
SPCC1020.10	oca2	serine/threonine protein kinase Oca2	1.02309	1.03532
SPBC16E9.16c	lsd90	Lsd90 protein	1.02211	1.44906
SPAC637.03		DUF1774 family multi-spanning conserved fungal membrane protein	1.00089	1.26005

## Sheet: common_noncoding_UP
Systematic ID	Gene name	Product description	nup211-1435*	rsm1∆
SPNCRNA.1179		non-coding RNA	2.90008	2.43161
SPNCRNA.584	lncRNA584	meiosis specific Smp foci lncRNA	2.68564	2.72407
SPNCRNA.1055		non-coding RNA, possible alternative UTR	2.38102	2.23982
SPNCRNA.1023		non-coding RNA, possible alternative UTR	2.31644	2.62762
SPNCRNA.472		non-coding RNA	2.06137	1.32714
SPNCRNA.1407		non-coding RNA, possible alternative UTR	2.04348	2.36592
SPNCRNA.1252		non-coding RNA	1.90474	1.65615
SPNCRNA.1271		non-coding RNA, possible alternative UTR	1.8904	1.8209
SPNCRNA.1664		non-coding RNA, possible alternative UTR	1.81495	2.46332
SPNCRNA.609		non-coding RNA, possible alternative UTR	1.76836	1.54998
SPNCRNA.1579		non-coding RNA, possible alternative UTR	1.73089	2.00648
SPNCRNA.1712	nc-pho1	cis-acting regulatory lncRNA prt, pho1 repressing	1.64362	2.00584
SPNCRNA.103	sme2	meiosis-specific Smp foci lncRNA Sme2, long isoform	1.53028	1.51358
SPNCRNA.827		non-coding RNA, possible alternative UTR	1.51159	1.48511
SPNCRNA.605		non-coding RNA	1.44752	2.32043
SPNCRNA.9001	prt2	cis-acting regulatory lncRNA prt2, pho84 repressing	1.43481	2.3059
SPNCRNA.1363		non-coding RNA	1.41106	1.05486
SPNCRNA.802		non-coding RNA	1.40828	1.29993
SPNCRNA.683		non-coding RNA	1.35868	1.24183
SPNCRNA.739		non-coding RNA	1.3324	1.41523
SPNCRNA.1523		non-coding RNA, possible alternative UTR	1.31593	1.94455
SPNCRNA.875		non-coding RNA	1.30795	1.20742
SPSNORNA.20	snR30	small nucleolar RNA U17	1.23071	1.24333
SPSNORNA.54	snr79	small nucleolar RNA snR79 (predicted)	1.21903	1.44941
SPNCRNA.1253		non-coding RNA	1.19598	1.26336
SPNCRNA.1687		non-coding RNA	1.19339	1.35841
SPNCRNA.887		non-coding RNA	1.19277	1.41654
SPNCRNA.1698	nc-tgp1	tgp1 sense interfering RNA	1.18005	1.15527
SPNCRNA.893	SPNCRNA.87	non-coding RNA	1.1694	1.63513
SPNCRNA.607		non-coding RNA	1.16701	1.22788
SPNCRNA.1033		non-coding RNA	1.16642	1.45673
SPNCRNA.1696	nam3	lncRNA nam3	1.1129	1.35345
SPSNORNA.50	snR98	box H/ACA small nucleolar RNA snR98	1.11066	1.08061
SPNCRNA.1280		non-coding RNA, possible alternative UTR	1.02067	1.73599
SPNCRNA.1169		non-coding RNA	1.00394	1.18909

## Sheet: common_coding_DOWN
Systematic ID	Gene name	Product description	nup211-1435*	rsm1∆
SPBPB8B6.04c	grt1	DNA-binding transcription factor Grt1	-3.57969	-3.49801
SPAC5H10.07		Schizosaccharomyces pombe specific protein	-3.51019	-1.8799
SPBC359.04c	pfl7	cell surface glycoprotein, flocculin Pfl7, DIPSY family	-3.26661	-1.94193
SPBPB21E7.07	aes1	phenazine biosynthesis PhzF protein family	-2.93012	-2.53508
SPBPB10D8.02c		arylsulfatase, implicated in vacuole related processes	-2.71744	-1.48177
SPCC70.08c		methyltransferase	-2.46247	-1.26319
SPAC513.03	mfm2	M-factor precursor Mfm2	-2.25171	-1.34623
SPAC186.06		phenazine biosynthesis PhzF protein family	-2.14099	-1.92888
SPAC227.17c		DUF3128 family, human c22orf39 ortholog, implicated in gene expression	-2.12508	-2.22032
SPBC1271.07c		N-acetyltransferase	-1.89853	-1.68796
SPBPB10D8.01		plasma membrane cysteine transmembrane transporter	-1.89514	-1.69559
SPAC5D6.01	rps2202	40S ribosomal protein S15a	-1.60717	-1.72106
SPCC330.03c		cytochrome b5 reductase	-1.53842	-2.21877
SPBP4G3.02	pho1	extracellular acid phosphatase Pho1	-1.46392	-2.22578
SPAC8E11.08c		dubious	-1.42088	-1.01939
SPAC11D3.02c		ELLA family acetyltransferase	-1.28838	-1.11144
SPAC23H4.05c		Schizosaccharomyces pombe specific protein	-1.27475	-1.25588
SPAC3H5.05c	rps1401	40S ribosomal protein S14	-1.20665	-1.18714
SPAC5H10.06c	adh4	mitochondrial alcohol dehydrogenase/NADH dehydrogenase Adh4	-1.15594	-1.11351
SPCC191.06		Schizosaccharomyces pombe specific protein	-1.09894	-1.13156
SPBC1D7.01	pfd1	prefoldin subunit Pfd1	-1.09752	-1.65887
SPBC24C6.04	put2	delta-1-pyrroline-5-carboxylate dehydrogenase Put2	-1.04813	-1.24159

## Sheet: common_noncoding_DOWN
Systematic ID	Gene name	Product description	nup211-1435*	rsm1∆
SPNCRNA.1487		non-coding RNA	-2.9036	-2.03924
SPNCRNA.863		non-coding RNA	-2.84147	-1.36495
SPNCRNA.871		non-coding RNA	-2.47409	-1.23943
SPNCRNA.1156		non-coding RNA, possible alternative UTR	-2.44468	-1.74516
SPNCRNA.1309		non-coding RNA	-2.11436	-2.91468
SPNCRNA.1301		non-coding RNA	-2.09437	-2.64861
SPNCRNA.1277		non-coding RNA	-1.91678	-1.34707
SPNCRNA.1358		non-coding RNA	-1.82201	-1.07185
SPNCRNA.1285		non-coding RNA	-1.79636	-1.1551
SPNCRNA.1078		non-coding RNA, possible alternative UTR	-1.77586	-1.94888
SPNCRNA.840		non-coding RNA	-1.7146	-1.70057
SPNCRNA.1425		non-coding RNA	-1.71296	-2.7645
SPNCRNA.647		non-coding RNA	-1.61358	-1.04245
SPNCRNA.903		non-coding RNA, possible alternative UTR	-1.59659	-1.92089
SPNCRNA.1496		non-coding RNA	-1.54024	-1.37201
SPNCRNA.1015		non-coding RNA	-1.53328	-1.11355
SPNCRNA.1477		non-coding RNA	-1.50994	-1.70623
SPNCRNA.1344		non-coding RNA	-1.49709	-1.13767
SPNCRNA.1146		non-coding RNA	-1.45628	-1.68005
SPNCRNA.763		non-coding RNA	-1.44486	-1.47844
SPNCRNA.178		non-coding RNA	-1.42479	-2.50879
SPNCRNA.1251		non-coding RNA, possible alternative UTR	-1.40991	-1.57364
SPNCRNA.1016		non-coding RNA	-1.36885	-1.9824
SPNCRNA.291		non-coding RNA	-1.33581	-2.07078
SPNCRNA.661		non-coding RNA	-1.3348	-1.5647
SPNCRNA.1459	nam1	cis-acting regulatory lncRNA nam1, byr2 repressing	-1.33083	-1.50495
SPNCRNA.733		non-coding RNA	-1.31953	-1.88329
SPNCRNA.1175		non-coding RNA	-1.30325	-1.00506
SPNCRNA.1510		non-coding RNA, possible alternative UTR	-1.21872	-1.32745
SPNCRNA.832		non-coding RNA, possible alternative UTR	-1.21711	-1.91809
SPNCRNA.1397		non-coding RNA	-1.19064	-1.82134
SPNCRNA.1524		non-coding RNA	-1.1765	-1.22758
SPNCRNA.1417		non-coding RNA	-1.09349	-1.04382
SPNCRNA.1636		non-coding RNA	-1.07955	-1.21124
SPNCRNA.1130		non-coding RNA	-1.06215	-1.38637
SPNCRNA.756		non-coding RNA	-1.03727	-1.01073
SPNCRNA.1034		non-coding RNA	-1.02685	-1.28603
